# Supplementary material
Source: ML conference proceedings conference paper supplement (https://openreview.net/forum?id=-K7-1WvKO3F)
Supplement: supplementary_material [file attachment]

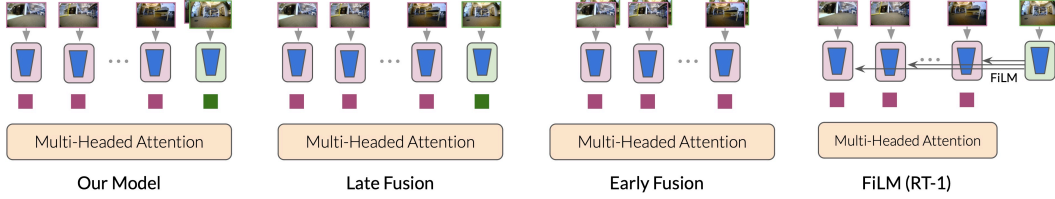

Figure 8: Different goal fusion architectures considered for ViNT.

## Appendix

### A ViNT Model Architecture

Table 5 shows the model architecture in detail. We use all 18 layers of the EfficientNet-B0 convolutional encoder [31], initialized from scratch, to tokenize the input and subgoal observations. For fusing the subgoal image with the current observations, we use *early fusion*: the two RGB images  $o_t$  and  $o_G$  are stacked along their channel dimension, yielding a  $6 \times 85 \times 64$  tensor per training data point. The stacked subgoal tensor is encoded using the EfficientNet encoder and tokenized with a 512-dimensional embedding. To encode a stacked tensor, we modify the first convolution to accept the desired number of input channels.

| Layer | Input [Dimensions]                           | Output [Dimensions]     | Layer Details                             |
|-------|----------------------------------------------|-------------------------|-------------------------------------------|
| 1     | $o_t, o_g$ [64, 85, 3]                       | $I_t^g$ [64, 85, 6]     | Concatenate along channel dimension.      |
| 2     | $I_t^g$ [64, 85, 6]                          | $E_t^g$ [1, 1000]       | Fusion EfficientNet Encoder [31]          |
| 3     | $o_{t:t-P}$ [P+1, 64, 85, 3]                 | $E_{t:t-P}$ [P+1, 1000] | Context EfficientNet Encoder [31]         |
| 4     | $E_t^g$ [1, 1000]                            | $E_t^{g'}$ [1, 512]     | Fusion Encoding Compression MLP           |
| 5     | $E_{t:t-P}$ [P+1, 1000]                      | $E_{t:t-P}'$ [P+1, 512] | Context Encoding Compression MLP          |
| 6     | $E_{t:t-P}'$ [P+1, 512], $E_t^{g'}$ [1, 512] | $S$ [P+2, 512]          | Concatenate into sequence                 |
| 7     | $S$ [P+2, 512]                               | $\tilde{S}$ [1, 32]     | Feed into Transformer Decoder             |
| 8     | $\tilde{S}$ [1, 32]                          | $D$                     | Predict distance with MLP head            |
| 9     | $\tilde{S}$ [1, 32]                          | $A$ , [1, T, 4]         | Predict odometry and angles with MLP head |

**Table 5: Architectural Details of ViNT** The inputs to the model are RGB images  $o_{t:t-P} \in [0, 1]^{P \times 3 \times 85 \times 64}$  and  $o_g \in [0, 1]^{3 \times 85 \times 64}$ , representing the current, past, and goal images. We seek to predict a  $T$  timestep horizon of positions (x, y), angles (sin, cos) and a distance.

**Goal fusion architectures:** There are many considerations for when and where to combine the input data for effective feature extraction and task performance as shown in Table 6. While FiLM works well for language, we find that training was unstable for image-navigation. As a result, we consider directly encoding image information and passing them to a Transformer. Fusing the goal with observation information in the transformer layers by concatenating separately encoded tokens is known as “late fusion”. Late fusion would work effectively for adaptation as there would be a single goal token that’s independently encoded. As a result, any input data could become that token. But, late fusion tends to perform poorly as the model requires joint features between current state and goal state to be passed to the Transformer. If independently encoded, the Transformer will only be able to attend to independently extracted features. “Early fusion”, on the other hand, will fuse the goal and observation input before the EfficientNet encoding, allowing the learning of joint features between the goal image and current state. This heavily increases performance, but at the cost of making adaptation not possible. This is because the goal information is now forced to become an image to be concatenated to the observation for creating the final token. With ViNT, this can be bypassed though via the adaptation process described in B.4. Specifically, we can perform task adaptation by predicting the final token conditioned on input data and task goal information and directly cutting out the goal encoder.

| Method           | Performance | Adaptation |
|------------------|-------------|------------|
| Late Fusion      | ✗           | ✓          |
| Early Fusion     | ✓           | ✗          |
| FiLM (RT-1) [27] | ✗           | ✓          |
| ViNT             | ✓           | ✓          |

**Table 6:** Results of different goal fusion architectures.

## B Implementation Details

### B.1 Training ViNT

See Table 7 for a detailed list of hyperparameters for training the ViNT foundation model.<sup>1</sup>

#### Training objective:

| Hyperparameter         | Value                   | Hyperparameter              | Value                     |
|------------------------|-------------------------|-----------------------------|---------------------------|
| <b>ViNT Model</b>      |                         | <b>Diffusion Training</b>   |                           |
| # Parameters           | 31M                     | Dropout                     | 0.1                       |
| Resolution             | $85 \times 64$          | Batch Size                  | 128                       |
| Encoder                | EfficientNet-B0         | Optimizer                   | AdamW                     |
| Token dim.             | 512                     | Warmup Steps                | 1000                      |
| Attn. hidden dim.      | 2048                    | Learning Rate               | $1e-4$                    |
| # Attn. layers $n_L$   | 4                       | LR Schedule                 | cosine decay              |
| # Attn. heads $n_H$    | 4                       | Adam $\beta_1$              | 0.95                      |
| FF dim                 | ??                      | Adam $\beta_2$              | 0.999                     |
| Temporal context $P$   | 5                       | Adam $\epsilon$             | $1e-8$                    |
| Prediction horizon $H$ | 5                       | Weight Decay                | 0.001                     |
| MLP layer sizes        | (256, 128, 64, 32)      | EMA Inv. Gamma              | 1.0                       |
| <b>ViNT Training</b>   |                         | EMA Power                   | 0.75                      |
| # Epochs $n_{ep}$      | 30                      | EMA Max Decay               | 0.9999                    |
| Batch size             | 300 <sup>1</sup>        | CFG Mask Proportion         | 0.2                       |
| Learning rate          | $5 \times 10^{-4}$      | Train Steps                 | 250,000                   |
| Optimizer              | AdamW                   | Training Time               | 30 hours                  |
| Warmup epochs          | 4                       | Compute Resources           | 1 $\times$ v4-8 TPU board |
| Scheduler              | Cosine                  | <b>Diffusion Sampling</b>   |                           |
| Scheduler Period       | 10                      | Sampler                     | DDIM [42]                 |
| Compute Resources      | 8 $\times$ V100         | DDIM $\eta$                 | 0.0                       |
| Training Time          | 1 - 2 days              | Sampling Steps              | 200                       |
| <b>Diffusion Model</b> |                         | Guidance Weight             | 1.0                       |
| # Parameters           | 318M                    | <b>Other</b>                |                           |
| Resolution             | $128 \times 128$        | Maximum distance            | 20                        |
| # Up/Down Blocks       | 4                       | Distance tradeoff $\lambda$ | 0.01                      |
| Attn. Resolutions      | 32, 16, 8               |                             |                           |
| Layers per Block       | 2                       |                             |                           |
| Attn. Head Dim         | 8                       |                             |                           |
| Channels               | 128, 128, 256, 512, 640 |                             |                           |
| Diffusion Type         | continuous time         |                             |                           |
| Noise Schedule         | linear                  |                             |                           |

**Table 7:** Hyperparameters for core components of ViNT

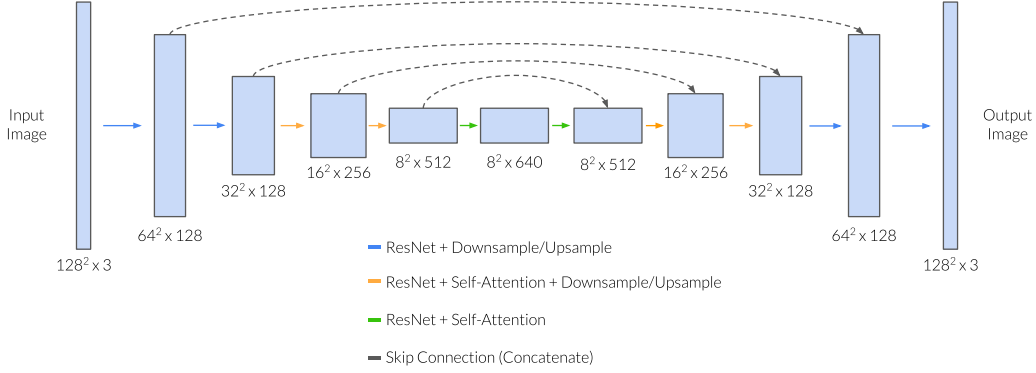

**Figure 9:** Subgoal diffusion model U-Net architecture. Each ResNet consists of 2 residual blocks. Downsampling and upsampling is done with strided convolutions.

## 480 B.2 Subgoal Diffusion

481 For generating subgoals, we use an image-to-image diffusion model. It takes an image  $o_t$  as input  
 482 and produces samples from  $g(s_i | o_t)$ , where  $s_i$  are candidate subgoal images reachable from  $o_t$ .  
 483 To produce training pairs for the diffusion model, we first select  $o_t$  uniformly at random from the  
 484 training data and then select  $s_i$  to fall between 5 and 20 timesteps in the future from  $o_t$ .

485 Following Saharia et al. [34], we implement image conditioning as simple channel-wise concatenation  
 486 to the U-Net input. We use the Flax U-Net implementation from the diffusers library [43] with  
 487 textual cross-attention removed since we do not condition on text inputs.

488 We use the continuous-time diffusion formulation from Kingma et al. [44] with a fixed linear noise  
 489 schedule rather than a learned one. Also unlike Kingma et al. [44], we use the unweighted training  
 490 objective, called  $L_{\text{simple}}$  in Ho et al. [33, Equation 14] and Kingma et al. [44, Appendix K]. We  
 491 employ classifier-free guidance [45] and find that it helps produce subgoals with better visual fidelity,  
 492 which is consistent with prior work [46].

## 493 B.3 Long-Horizon Physical Search via Topological Graphs

494 As in Shah and Levine [26], we implement physical search similarly to a standard A\* algorithm, by  
 495 keeping track of an open set  $\Omega$  of possible unvisited subgoals (generated by our diffusion model)  
 496 and following Alg. 1.

---

### Algorithm 1: Long-Horizon Navigation via Topological Graph

---

```

1: while goal  $G$  not reached do
2:    $s \leftarrow \min_f(\Omega)$ ;
3:    $P \leftarrow \text{ShortestPath}(\mathcal{M}, o_t, s^-)$ 
4:   for  $(s, s')$  in  $P$  do
5:     ViNT.GoToGoal( $s'$ );
6:   end for
7:   ViNT.GoToGoal( $s$ )
8:    $o_t \leftarrow \text{Observe}()$ ;
9:   AddNode( $\mathcal{M}, o_t$ , parent:  $s^-$ );
10:  Sample  $s_i \sim g(s_i | o_t)$ ;
11:  Add( $\Omega, s_i$ );
12: end while

```

---

<sup>1</sup>Over the course of the project, we used a variety of workstations equipped with different GPU configurations, including 3×1080Ti, 2×4090, 4×P100, 8×V100, and 8×A100. With the model architecture fixed, the batch size and training time varies significantly across these devices, and the entry in Table 7 is representative of our most common training configuration.

Nodes are visited according to a costing function  $f(s)$  that depends on the distance from the current state  $o_t$  to the parent node  $s^-$  (measured along the graph), the predicted distance from  $s^-$  to  $s$ , and a heuristic function  $h$  (similar to that of A\*) providing long-horizon navigation hints:

$$f(s) = d_{\mathcal{M}}(o_t, s^-) + d_{\text{pred}}(s^-, s) + h(s, G, C)$$

In general, the heuristic can be any function providing a notion of distance between a subgoal  $s$  and the long-horizon goal  $G$ , optionally with some context  $C$ . For our experiments, we considered three heuristics to demonstrate the flexibility of our approach:

- **Coverage maximization:** For undirected exploration we have no long-horizon goal and thus use  $h(s) = 0$ .
- **Position-guided:** For long-horizon GPS goals (outdoors) and 2D position goals (indoors), we use Euclidean distance  $h(s) = \|s - G\|$ .
- **Satellite-guided:** In the context-guided experiments, we train a learned heuristic function that uses the satellite image as an input to learn a heuristic for “good” subgoals. We train a convolutional neural network on the overhead image to predict the probability that the subgoal  $s$  is included on a trajectory from  $o_t$  to  $G$ , trained using a contrastive objective [47]. Additional information can be found in Shah and Levine [26].

## B.4 Fine-tuning ViNT

### Image Fine-tuning:

- **Architecture:** We utilize the exact same architecture as ViNT with no changes.
- **Training:** For fine-tuning the image-goal directed model, we utilize the same training process for ViNT with a learning rate of 0.0001, AdamW optimizer, but no warmup or cosine scheduler. We train with a batch size of 200 across 8 GeForce 1080 Ti GPUs for all fine-tuning and adaptation experiments and we do not mix any prior data for fine-tuned training.

### GPS-Adaptation:

- **Architecture:** To adapt to GPS-style goals, we cut off the goal encoder block from ViNT. We then learn a fixed tensor of size 3000 and concatenate it to the GPS-command goal in ego-centric coordinates. We then pass this into a 2-layer MLP which outputs the prediction of the final token for the transformer. The architecture is shown in Figure 10.
- **Training:** During training, instead of randomly sampling future images and passing them into the goal encoder, we sample future odometry information. Once we have a future goal coordinate for self-supervision, we convert to local coordinates and pass into our architecture and optimize the same objective as ViNT. We use a cosine scheduler with a learning rate warmup to 0.0001 for 4 epochs. We also sample goal points from between 1.25s and 1.75s rather than from 0.5s to 2.5s.

### Command-Adaptation:

- **Architecture:** For discrete command goals, we adopt a similar approach for GPS-style goals. We learn a fixed tensor for each discrete command and use the command index to select the corresponding latent to pass into a 2-layer MLP for predicting the final token. In this way, we learn a dictionary of latents, each corresponding to a distinct command. This architecture is illustrated in Figure 10 as well.
- **Training:** If training data is labelled with command, we just supply the command and run standard training. We assume training data is not labelled with the discrete command, so we label the trajectories with commands on-the-fly. For our experiments, we use “left”, “right”, and “straight” as our discrete commands. We sample a future odometry point just like the GPS Adaptation, but rather than using the point itself, we use the lateral coordinates to determine what command that training example corresponds to. For our experiments we bin each trajectory that has a normalized lateral coordinate greater than 0.05, otherwise it is labelled as “straight”. We use a cosine scheduler with a learning rate warmup to 0.0001 for 4 epochs.

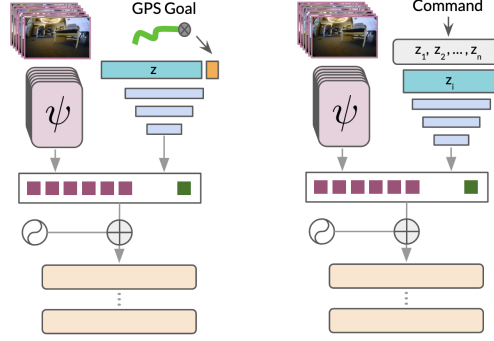

**Figure 10:** Different adaptation architectures for ViNT. Shown on the left is the GPS-adaptation architecture. As seen, the local coordinates of the goal are concatenated to the fixed latent,  $z$ . On the right is the command-adaptation architecture where we assume command index  $i$  is given, hence sending  $z_i$  to the MLP.

|    | Dataset          | Platform   | Speed  | Total Hrs. | Hrs. Used | Environment |
|----|------------------|------------|--------|------------|-----------|-------------|
| 1  | GoStanford [48]  | TurtleBot2 | 0.5m/s | 17h        | 14h       | office      |
| 2  | RECON [38]       | Jackal     | 1m/s   | 25h        | 25h       | off-road    |
| 3  | CoryHall [37]    | RC Car     | 1.2m/s | 2h         | 2h        | hallways    |
| 4  | Berkeley [26]    | Jackal     | 2m/s   | 4h         | 4h        | suburban    |
| 5  | SCAND-S [49]     | Spot       | 1.5m/s | 8h         | 4h        | sidewalks   |
| 6  | SCAND-J [49]     | Jackal     | 2m/s   | 1h         | 1h        | sidewalks   |
| 7  | Seattle [50]     | Warthog    | 5m/s   | 1h         | 1h        | off-road    |
| 8  | TartanDrive [51] | ATV        | 10m/s  | 7h         | 5h        | off-road    |
| 9  | NeBula [52]      | ATV        | 10m/s  | 10h        | 10h       | off-road    |
| 10 | SACSoN [53]      | TurtleBot2 | 0.5m/s | 75h        | 10h       | office      |
| 11 | BDD [13]         | Car(s)     | 20m/s  | 10h        | 4h        | on-road     |
|    | Ours             |            |        | 160h       | 80h       |             |

**Table 8:** The ViNT training dataset contains over 100 hours of navigation data in diverse environments across 8 different robots.

## 546 C Training Dataset

547 The ViNT training dataset contains over 100 hours of real-world navigation trajectories, sourced  
548 entirely from existing datasets. The dataset consists of a combination of tele-operated and au-  
549 tonomous navigation behaviors collected across 8 distinct robotic platforms, including 4 commer-  
550 cially available platforms (TurtleBot, Clearpath Jackal, Warthog and Spot) and several custom plat-  
551 forms (Yamaha Viking ATV, RC Car, passenger automobiles). The trajectories contain widely vary-  
552 ing robot dynamics and top speeds, ranging between 0.2 and 10m/s, operating in a diverse set of  
553 environments (e.g., office buildings, hallways, suburban, off-road trails, university campuses, etc.).  
554 All data is either publicly available, or collected by *other* researchers for past projects; *no additional*  
555 *training data was collected specifically for training ViNT.*

556 Remember to mention: total size, number of robots, conversion to number of frames and so on.

## 557 D Robotic Platforms for Evaluating ViNT

558 **Vizbot:** A custom-built robot platform inspired by the design of Niwa et al. [54], based on a  
559 Roomba. It is equipped with an off-the-shelf PCB-mounted fisheye camera.

560 **Unitree Go 1:** A commercially available quadruped robot equipped with the original forward-facing  
561 camera. *There is no training data from a Go1 in the training dataset*, although SCAND has some  
562 data from a Boston Dynamics Spot, which is a very different platform.

563 **Clearpath Jackal UGV:** A commercially available off-road platform equipped with an off-the-  
564 shelf PCB-mounted fisheye camera. *This system resembles the data collection platform used for the*  
565 *RECON, Berkeley, and SCAND-J datasets*, but has a different camera and mounting height.

566 **LoCoBot:** A popular open-source platform based on a Kobuki, equipped with an off-the-shelf PCB-  
567 mounted fisheye camera. *There is no training data from a LoCoBot*, although GS was collected on  
568 a similar TurtleBot2, albeit with a different spherical camera at a lower height.

## 569 **E Evaluation Setup and Details**

### 570 **E.1 Real-World Setup**

#### 571 **E.1.1 Indoor Experiments**

572 For setting up the indoor coverage exploration experiments on the LoCoBot, we choose a random  
573 starting point on the building’s floor, and keep the starting point consistent across all baselines we  
574 test. For large scale floors, we test a variety of starting points on the floor, since most baselines are  
575 not able to cover the entire floor in the 10 minute time limit we enforce on the experiments.

576 For setting up the indoor guidance exploration experiments on the LoCoBot, we mark the starting  
577 point of the LoCoBot we drive the LoCoBot to the desired goal point (around 50m to 100m away),  
578 and use the in-built odometry tracking system on the LoCoBot to specify an odometry goal point to  
579 the exploration algorithm when we evaluate it.

### 580 **E.2 Multi-robot Generalization Experiments**

581 The setup for the multi-robot generalization experiment is very similar to the coverage exploration  
582 experiments. The only differences are the baselines we evaluate.

#### 583 **E.2.1 Baselines**

584 For generating Table 1, we test three baseline low-level policies on each robot. Each baseline uses  
585 the graph-based exploration scheme described in Section 4.2. We use the following baselines:

- 586 1. **In-Domain:** We train a single-dataset policy model (ViNT architecture) and diffusion  
587 model on the RECON and SACSoN datasets, the largest outdoor and indoor datasets in  
588 our training set, and evaluate them on each of our robots to identify the best single-dataset  
589 model for each robot.
- 590 2. **GNM:** We use the pre-trained model checkpoint from the authors of GNM [18] coupled  
591 with *our* diffusion model (since GNM is not compatible with the exploration task) to eval-  
592 uate each robot.
- 593 3. **ViNT:** We use our pre-trained ViNT policy and image diffusion model (no fine-tuning) to  
594 evaluate each robot.

### 595 **E.3 CARLA Setup**

596 This section describes the setup and implementation details for ViNT fine-tuning and adaptation  
597 experiments in the CARLA autonomous driving simulator, as presented in Sections 6.3 and 6.4.

#### 598 **E.3.1 CARLA Data Collection**

599 We collect expert trajectories with an oracle rule-based self-driving agent and gather odometry and  
600 RGB information across the trajectory at 4 Hz. These trajectories have random spawn points and  
601 random destination points up to 900 meters in length. We collect 52 trajectories in the CARLA  
602 Town 02 for held-out testing, and collect 181 trajectories in Town 01 for training. This makes  
603 for a dataset size of 5 hours for the autopilot control data. Inspired by [21], we also collect short  
604 trajectories of the agent correcting back onto the right lane after drifting off course in Town 01  
605 and Town 02 for training and testing, respectively. This data is 4 hours long, and we add it to the  
606 autopilot data for training.

### E.3.2 Fine-tuning Experiments

For testing the fine-tuning system which trains ViNT to do the same task in new domains, we utilize the collected test trajectories as expert maps to follow. Each Town 02 test trajectory creates a graph where every node is a timestamped odometry point corresponding to an image. To evaluate a model on a test trajectory, we spawn it at the same start point and localize it on the trajectory’s map. We then query the image for the goal node which corresponds to node 1.5s after the current node. This goal image is sent to ViNT along with the 4Hz image context to compute a short-range trajectory. This is tracked by a simple PID controller. The average progress towards the goal before collision is collected and reported across all trials. Table 4 summarizes the results of these experiments with multiple baselines and data sizes.

### E.3.3 Adaptation Experiments

To test the new tasks, we adopt a similar evaluation setup to the fine-tuning experiments. But we query the odometry for the goal node which corresponds to node 1.5s after the current node rather than the image. For positional-adaptation, we move the goal coordinates into a local frame and send it to ViNT. For routing-adaptation, we determine the difference in lateral coordinates between the current node and the goal node. We choose the current node as reference to ensure an open-loop experiment and to allow for pre-computation of the command signals to be sent. We then apply the same binning strategy during training using a 0.05 normalized distance as the boundary between “left”, “right”, and “straight”. The control system downstream of this is identical to image fine-tuning and the experiment terminates when at the goal or when colliding. The progress towards the goal before collision is collected and averaged across all trials in Table 4.

### E.3.4 Baselines

We have the following baselines for the CARLA experiments:

1. **Scratch:** ViNT trained from scratch on the CARLA on-task dataset.
2. **Pre-trained Visual Representations**
  - (a) **ImageNet:** ViNT initialized with the EfficientNet-B0 weights pre-trained on ImageNet, other parameters initialized from scratch, and fine-tuned with the CARLA on-task dataset.
  - (b) **SimCLR:** ViNT initialized with the EfficientNet-B0 weights pre-trained with SimCLR [7] on the training data described in Section C, other parameters initialized from scratch, and fine-tuned with the CARLA on-task dataset.
  - (c) **VC-1:** ViNT initialized with a pre-trained ViT-B model checkpoint from the authors of VC-1 [40] and *frozen*, other parameters initialized from scratch, and fine-tuned with the CARLA on-task dataset. The VC-1 encoder is pre-trained on a combination of Ego4D, manipulation, navigation, and ImageNet images using Masked Auto-Encoding [39, 55].
3. **GNM:** The pre-trained embodiment-agnostic model checkpoint from the authors of GNM [18], fine-tuned with the CARLA on-task dataset. Note that GNM has 8.7M trainable parameters, compared to ViNT’s 31M.

We note that the VC-1 baseline’s weak performance in Section 6.4 may be explained by the fact that it is *frozen*, while all other visual encoders were free to fine-tune. This is representative of typical downstream usage [40]. Despite training on multiple, diverse datasets, the visual representation’s general-purpose features are not optimized for the navigation task, hampering zero-shot transfer to out-of-domain tasks. To provide a fair comparison of the quality of pre-trained visual features, we compare this performance to ViNT-FE (a pre-trained ViNT model that has its visual encoder frozen). ViNT-FE has an equal number of trainable parameters to the VC-1 baseline, and frozen visual representations (see Table 9).

| Method    | Images | Positions |
|-----------|--------|-----------|
| VC-1 [40] | 0.19   | 0.49      |
| ViNT-FE   | 0.32   | 0.78      |
| ViNT      | 0.82   | 0.89      |

**Table 9:** Evaluation of ViNT fine-tuning with and without a frozen encoder, as compared to a general-purpose visual encoder. Even when frozen, ViNT’s navigation-relevant features appear to transfer more readily to out-of-distribution inputs than general-purpose features.

## 659 **F Code and Video Release**

660 We are providing the code for implementation and deployment of ViNT in the supplemental material.

661 We are also sharing videos of ViNT deployed on diverse robots and in challenging terrains on our  
662 project page (we were not able to upload it due to size limitations). Please check our project page  
663 for these videos: [sites.google.com/view/vint-anon/](https://sites.google.com/view/vint-anon/)
